# Supplementary material for: Transient viral exposure drives functionally-coordinated humoral immune responses in HIV-1 post-treatment controllers
Source: PubMed Central journal article supplement (PMC9001681; doi:10.1038/s41467-022-29511-1), 2022-04-11
Supplement: 41467_2022_29511_MOESM3_ESM.pdf [file 41467_2022_29511_MOESM3_ESM.pdf]

## **Description of Additional Supplementary Files**

**Supplementary Data 1:** Statistics of multiparametric analyses
