# Supplementary material for: Transient viral exposure drives functionally-coordinated humoral immune responses in HIV-1 post-treatment controllers
Source: Nat Commun. 2022 Apr 11;13:1944. doi: 10.1038/s41467-022-29511-1 (PMC9001681; doi:10.1038/s41467-022-29511-1)
Supplement: Supplementary file 6 — Source Data [file 41467_2022_29511_MOESM6_ESM.xlsx]

## Sheet: 1A
Figure 1a
ePTC	sPTC
12	10

## Sheet: 1B
Figure 1b
VL>50	VL 50-400	VL>400
73.7	52.6	21.1
53.8	0	53.8
46.2	15.4	30.8
55	52.5	2.5
18.9	13.5	5.4
100	66.7	33.3
22.2	22.2	0
16.1	6.5	9.7
16.7	0	16.7
6.3	6.3	0
3.2	0	3.2
2.9	2.9	0

## Sheet: 1C
Figure 1c
BG505 SOSIP
sPTC post-TI	33	24	47	38	21	52	66	52	74	142
PTNC ART	55.2	43.91	31.49	144.7	23.26	150.5	42.82	79.78	77.33	61.11	36.17	25.25	31.81	80.57	95.1	148.3	53.49	40.31	128.9	29.76
PTNC post-TI	170.4	167.4	133.7	154.5	156.2	153.3	163.7	198.4	182.6	169.7	170.4	167.6	167.9	164.6	157.9	175	177.6	140.3	159.2	149.9
ePTC post-TI	143	120	67	59	134	116	145	128	11	158	96	159
YU2 gp140
sPTC post-TI	90	94	101	67	55	78	93	117	106	160
PTNC ART	131	149.7	118.4	157.6	149	174.9	132.9	129.6	158	167.9	115.3	134.1	141.6	159.5	171.4	172.7	146.1	90.43	171.4	139.4
PTNC post-TI	169	172.4	168.5	162.4	185.9	164.4	169.3	173.3	164.5	164.6	167.7	161.4	163.4	173	161.3	171.7	170.2	169.1	160.3	155.6
ePTC post-TI	164	165	163	133	153	162	174	143	23	167	161	186
UG21 gp140
sPTC post-TI	139	133	107	94	99	80	118	113	122	147
PTNC ART	113.2	137.7	104.2	156.5	145.8	171.5	146.4	138.7	168.9	146.9	104.6	130	163.7	161.3	175.9	161.8	130.6	106.1	181.7	126.3
PTNC post-TI	165.8	172.2	178.7	191	188.7	181.3	181.3	189.5	179.8	179.2	177.2	187.9	183.1	199.3	199.3	197.1	189.2	179.6	174.5	174.7
ePTC post-TI	187	187	167	154	184	174	183	187	58	166.2	167.8	197.1
UG37 gp140
sPTC post-TI	132	91	80	95	101	120	117	116	148	175
PTNC ART	94.37	120.8	74.64	154.5	129.7	175.4	109.5	125.7	169.4	139.5	75	104.6	121.4	135.8	163.5	158.5	115.5	67.34	184	111.6
PTNC post-TI	167.7	172.2	173.1	174.9	176.3	181.1	195.7	193.6	189.4	192.9	193.9	198.4	194.6	188.9	189.6	187.8	169.5	184.2	199	183
ePTC post-TI	187	186	160	143	192	179	191	194	39	178	171	182
YU2 gp120
sPTC post-TI	84	71	50	41	34	50	105	90	75	132
PTNC ART	61.53	53.43	53.33	170.1	32.67	165.4	53.96	95.18	52.87	80.38	58.62	44.93	27.75	116.3	119.2	168.5	60.69	43.71	160.4	55.11
PTNC post-TI	178.8	174.5	157.9	156.3	160.2	163	157.7	175.1	175.1	168.9	167	161.6	157.8	168.4	161.8	164.6	165.5	167	162.5	154.2
ePTC post-TI	164	148	118	116	152	148	179	146	39	177	166	175
CN54 gp120
sPTC post-TI	134	126	92	91	95	104	131	122	145	169
PTNC ART	52.01	48.36	48.39	155.4	35.26	185.1	29.69	72.15	32.87	47.49	28.26	29.48	37.1	101.2	86.09	177	21.35	43.76	183.1	37.2
PTNC post-TI	174.9	169.8	186.7	179.3	180.1	175.7	181	197	180.8	192.4	194	196.6	185.1	191.2	184.1	186	185.3	177.1	171.1	184
ePTC post-TI	194	191	169	156	187	181	192	195	30	178.3	165.1	174.5
gp41 MN
sPTC post-TI	150	146	137	144	142	145	145	159	150	161
PTNC ART	154.8	162.3	153.6	163.5	167.4	164	155.2	149	172.5	170.2	154.1	153.1	155.4	157.9	164.1	161	153.6	158.3	168.9	151.8
PTNC post-TI	161.1	159.6	158.7	159.7	166	167.4	168.5	174.7	167.1	169.7	164.1	159.3	164.1	163.7	156.7	165.2	163.4	157.2	166.7	165.2
ePTC post-TI	157	163	156	152	189	161	170	163	134	170	169	191
p24 IIIB
sPTC post-TI	144	148	111	145	130	159	150	107	145	171
PTNC ART	92.88	104.2	98.01	168.5	80.64	156.1	51.1	109.2	152.4	41.06	45.12	43.27	95.45	97.29	91.59	135.4	62.14	40.93	145	112.5
PTNC post-TI	176.5	171.4	177.7	173.3	178.5	166.4	164.9	198.8	182.3	167.3	194.6	189.6	198.9	193.6	195.2	195	182.9	167.2	193.6	197.3
ePTC post-TI	174	166	155	143	80	161	163	167	146	175	163	167

## Sheet: 1D
Figure 1d
	cART	Post ATI
	10	5240
	10	1670
	10	168
	10	35000
	10	7010
	10	37618
	10	890
	10	206
	10	45300
	10	13339
	10	18485
	10	3313
	10	9600
	10	34700
	10	4400
	10	105000
	10	9324
	10	112143
	10	59140
	10	35672

## Sheet: 1E
Figure 1e
	cART	Post ATI
	0	71
	0	88
	0	35
	56.87	87
	0	0.47
	26	36
	0	32
	7.13	33
	0	44
	0.65	55
	0	76
	3.78	92
	0	9.27
	0	72
	14.86	78
	33.28	88
	8.51	82
	6.05	4.6
	3.93	58
	7.35	76

## Sheet: 1F
Figure 1f
BG505 SOSIP
ART	post-TI (1)	post-TI (2)	M12	M24
93.18	88.97	88.58	77.35
88.38	76.68	60.13	69.48	79.47
65.79	49.72	148.2
137.8	163.5	194.7
52.21	135.4	116
YU2 gp140
ART	post-TI (1)	post-TI (2)	M12	M24
157.6	160.5	152.3	148.9
162.3	147.4	106.2	115.4	118.5
153.6	150.1	173.5
160.2	174.7	194.9
141.3	178.1	162
YU2 gp120
ART	post-TI (1)	post-TI (2)	M12	M24
140.4	135.4	123.9	113
82.73	74.62	66.69	68.19	70.32
102.3	86.55	151.8
133.6	165.8	178.7
79.18	159.4	148
gp41 MN
ART	post-TI (1)	post-TI (2)	M12	M24
163.3	163.1	164.4	159
170.2	172.6	162.9	153.3	158.3
169.2	169.4	177.7
164.5	167.3	196.5
150.6	158.4	161
p24 IIIB
ART	post-TI (1)	post-TI (2)	M12	M24
138.7	147.4	150	139.6
52.03	54.24	94.14	109.7	102.9
122.6	96.31	179.8
52.08	165	187.6
88.89	192.3	161

## Sheet: 1G
Figure 1g
PTC	1	2	4	5	6	7	9	10	11	12	13	17	19	25	26	28	33	34	35	36			PTNC	PTNC2	PTNC4	PTNC6	PTNC8	PTNC9	PTNC12	PTNC16	PTNC20	PTNC22	PTNC24	PTNC26	PTNC28	PTNC30	PTNC32	PTNC40	PTNC42	PTNC44	PTNC48	PTNC50	PTNC52	PTNC54
OLP																							OLP
1	0.57	0.129	0.196	0.242	0.207	0.349	0.328	0.159	0.13	0.284	0.108	0.266	0.583	0.398	0.265	0.221	0.125	0.247	0.185	0.274			1	0.267	0.135	0.146	0.207	0.134	0.081	0.463	0.148	0.401	0.181	0.304	0.137	0.204	0.44	0.133	0.274	0.174	0.279	0.128	0.094	0.19
2	0.533	0.131	0.123	0.114	0.153	0.124	0.259	0.164	0.109	0.236	0.101	0.227	0.375	0.315	0.096	0.154	0.123	0.152	0.189	0.186			2	0.29	0.09	0.114	0.113	0.085	0.085	0.398	0.127	0.427	0.084	0.108	0.096	0.1	0.154	0.122	0.101	0.107	0.242	0.106	0.096	0.223
3	0.712	0.119	0.123	0.105	0.192	0.148	0.383	0.178	0.111	0.233	0.1	0.329	0.192	0.351	0.094	0.14	0.131	0.192	2.932	0.291			3	0.685	0.163	0.113	0.08	0.072	0.081	0.542	0.153	0.65	0.08	0.115	0.09	0.099	0.097	0.085	0.077	0.119	0.211	0.204	0.092	0.189
4	0.908	0.133	0.153	0.206	0.242	0.156	0.575	0.205	0.143	0.276	0.122	0.572	0.234	0.353	0.169	0.171	0.16	0.244	0.272	0.322			4	0.959	0.086	0.137	0.087	0.077	0.091	0.646	0.205	0.909	0.089	0.165	0.108	0.115	0.205	0.094	0.092	0.145	0.266	0.212	0.108	0.138
5	0.935	0.123	0.134	0.152	0.222	0.287	0.69	0.159	0.134	0.249	0.108	0.525	0.219	0.344	0.162	0.127	0.136	0.242	0.288	0.295			5	1.132	0.115	0.176	0.085	0.134	0.117	0.655	0.328	0.947	0.079	0.12	0.117	0.086	0.095	0.083	0.083	0.132	0.254	0.21	0.094	0.098
6	0.704	0.114	0.123	0.15	0.135	0.083	0.486	0.155	0.102	0.226	0.091	0.337	0.16	0.335	0.121	0.134	0.108	0.192	0.204	0.264			6	0.999	0.066	0.085	0.057	0.049	0.063	0.484	0.149	0.824	0.059	1.207	0.06	0.065	0.077	0.058	0.151	0.098	0.225	0.135	0.077	0.069
7	0.852	0.119	0.132	0.557	0.33	0.216	0.552	0.175	0.134	0.276	0.141	0.619	0.546	0.315	0.393	0.17	0.15	0.238	0.279	0.251			7	1.178	0.105	0.126	0.068	0.054	0.061	0.476	0.304	0.827	0.072	0.109	0.221	0.131	0.098	0.12	0.077	0.125	0.235	0.217	0.082	0.098
8	0.681	0.137	0.145	0.14	0.286	0.107	0.488	0.166	0.128	0.27	0.125	0.557	0.204	0.36	0.125	0.166	0.148	0.219	0.257	0.292			8	1.161	0.135	0.128	0.141	0.072	0.077	0.601	0.227	0.849	0.081	0.127	0.121	0.117	0.105	0.096	0.089	0.13	0.231	0.23	0.094	0.193
9	0.838	0.162	0.134	0.104	0.268	0.103	0.516	0.171	0.121	0.256	0.111	0.521	0.143	0.333	0.101	0.175	0.15	0.207	0.176	0.177			9	1.164	0.16	0.143	0.117	0.098	0.091	0.609	0.266	1.05	0.083	0.116	0.091	0.1	0.11	0.096	0.087	0.116	0.244	0.26	0.096	0.101
10	0.66	0.136	0.124	0.107	0.206	0.093	0.495	0.163	0.111	0.247	0.099	0.39	0.165	0.324	0.105	0.124	0.146	0.189	0.238	0.209			10	0.85	0.095	0.115	0.071	0.075	0.08	0.491	0.239	0.9	0.076	0.11	0.091	0.133	0.108	0.091	0.085	0.108	0.22	0.198	0.097	0.116
11	0.631	0.189	0.183	0.117	0.221	0.12	0.438	0.313	0.112	0.215	0.112	0.316	0.317	0.216	0.119	0.145	0.14	0.195	0.193	0.243			11	0.8	0.193	0.142	0.132	0.075	0.097	0.539	0.228	0.924	0.133	0.108	0.177	0.304	0.279	0.125	0.092	0.154	0.323	0.262	0.101	0.151
12	0.861	0.23	0.572	0.155	0.202	0.124	1.754	0.606	0.152	0.191	0.148	0.601	0.468	0.304	0.116	0.468	0.141	0.263	0.581	0.444			12	0.87	0.314	0.386	0.27	0.194	0.169	0.897	0.329	0.935	0.264	0.268	0.495	0.532	0.56	0.431	0.088	0.476	0.332	0.28	0.094	0.243
13	3.278	0.119	0.118	0.142	0.227	0.254	0.794	0.173	0.153	0.241	0.108	0.443	0.152	0.363	0.104	0.244	0.291	0.376	0.285	0.251			13	1.296	0.102	0.144	0.079	0.097	0.087	0.582	0.538	0.822	0.093	0.23	0.086	0.214	0.189	0.107	0.075	0.162	0.348	0.107	0.098	0.12
14	2.988	0.134	0.125	0.117	0.168	0.115	0.634	0.181	0.28	0.367	0.16	0.424	0.201	0.413	0.111	0.191	0.189	0.173	0.311	0.264			14	1.317	0.149	0.189	0.08	0.096	0.099	0.646	0.408	0.796	0.078	0.122	0.24	0.107	0.129	0.079	0.081	0.111	0.29	0.206	0.094	0.122
15	0.81	0.12	0.122	0.142	0.214	0.104	0.475	0.155	0.131	0.27	0.109	0.248	0.138	0.647	0.107	0.143	0.618	0.193	0.229	0.208			15	1.26	0.133	0.133	0.089	0.078	0.081	0.587	0.35	0.943	0.075	0.122	0.265	0.116	0.131	0.819	0.077	0.112	0.229	0.203	0.088	0.103
16	1.071	0.114	0.173	0.129	0.251	0.095	0.683	0.168	0.164	0.231	0.099	0.616	0.74	0.355	0.106	0.211	0.169	0.262	0.303	0.242			16	1.264	0.096	0.125	0.085	0.08	0.093	0.686	0.345	1.074	0.078	0.129	0.145	0.092	0.139	0.083	0.081	0.123	0.346	0.236	0.112	0.104
17	0.708	0.103	0.12	0.103	0.198	0.147	0.423	0.143	0.104	0.238	0.269	0.377	0.119	0.345	0.083	0.15	0.136	0.149	0.212	0.207			17	1.057	0.088	0.096	0.075	0.077	0.08	0.613	0.139	0.695	0.078	2.447	0.1	0.088	0.129	0.083	0.073	0.099	0.232	0.205	0.085	0.086
18	0.67	0.079	0.101	0.095	0.186	0.135	0.455	0.138	0.107	0.225	0.075	0.441	0.106	0.345	0.078	0.125	0.13	0.181	0.249	0.207			18	0.288	0.056	0.088	0.049	0.045	0.056	0.618	0.25	1.007	0.055	0.122	0.13	0.075	0.067	0.056	0.052	0.083	0.23	0.185	0.085	0.07
19	1.35	0.093	0.105	0.082	0.197	0.084	0.551	0.143	0.116	0.827	0.134	0.531	0.116	0.319	0.088	0.174	0.138	0.159	0.328	0.274			19	1.23	0.067	0.089	0.054	0.064	0.125	0.388	0.186	0.96	0.061	0.111	0.07	0.06	0.144	0.066	0.054	0.093	0.244	0.19	0.07	0.067
20	1.074	0.112	0.122	0.112	0.201	0.1	0.563	0.168	0.14	0.266	0.109	0.514	0.161	0.623	0.121	0.18	0.148	0.207	0.272	2.786			20	1.185	0.087	0.099	0.081	0.071	0.317	0.72	0.151	0.995	0.087	0.128	0.149	0.081	0.202	0.086	0.083	0.113	0.265	0.249	0.095	0.09
21	1.177	0.124	0.134	0.128	0.22	0.105	0.759	0.177	0.144	0.285	0.11	0.642	0.191	0.425	0.136	0.167	0.16	0.239	0.376	0.342			21	1.273	0.1	0.148	0.084	0.11	0.09	1.762	0.296	0.915	0.079	0.148	0.092	0.088	0.226	0.089	0.083	0.134	0.272	0.223	0.095	0.097
22	0.956	0.109	0.124	0.103	0.196	0.146	0.573	0.157	0.118	0.336	0.106	0.441	0.161	0.769	0.1	0.149	0.152	0.18	0.246	0.194			22	1.17	0.095	0.11	0.073	0.1	0.087	0.518	0.246	0.887	0.076	0.125	0.084	0.187	0.217	0.082	0.082	0.108	0.234	0.193	0.09	0.088
23	0.926	0.101	0.172	0.097	0.186	1.358	0.48	0.148	0.114	0.383	0.132	0.39	0.122	0.195	0.092	0.122	0.141	0.186	0.26	0.221			23	1.174	0.095	0.111	0.073	0.536	0.087	0.535	0.204	0.826	0.085	0.116	0.099	0.119	0.135	0.087	0.079	0.109	0.242	0.19	0.086	0.096
24	0.911	0.15	0.295	0.109	0.18	0.095	0.523	0.277	0.723	0.224	0.628	0.565	0.241	0.238	0.101	0.212	0.154	0.162	0.163	0.234			24	0.841	0.162	0.2	0.103	0.119	0.131	0.547	0.229	0.751	0.178	0.125	0.21	0.265	0.241	0.193	0.091	0.224	0.296	0.231	0.089	0.155
25	1.107	0.135	0.124	0.117	0.236	0.299	0.966	0.116	0.316	0.27	0.198	0.465	0.161	0.358	0.118	0.255	0.175	0.219	0.345	0.245			25	1.458	0.45	0.162	0.089	0.086	0.086	0.621	0.256	0.993	0.093	0.139	0.096	0.106	0.152	0.093	0.077	0.153	0.252	0.245	0.094	0.09
26	1.317	0.114	0.124	0.109	0.226	0.243	0.964	0.191	0.14	0.26	0.107	0.419	0.148	0.38	0.132	0.471	0.269	0.29	0.345	0.188			26	1.433	0.107	0.113	0.082	0.075	0.088	0.491	0.303	0.849	0.095	0.147	0.125	0.106	0.139	0.081	0.083	0.122	0.264	0.247	0.105	0.092
27	1.096	0.12	0.113	0.131	0.22	0.121	0.768	0.17	0.132	0.25	0.098	0.474	0.147	0.37	0.103	0.212	0.162	0.27	0.341	0.192			27	1.555	0.118	0.135	0.076	0.071	0.081	0.633	0.325	1.028	0.08	0.132	0.15	0.103	0.126	0.081	0.075	0.116	0.279	0.258	0.095	0.09
28	3.17	0.102	0.134	0.101	0.173	0.183	0.437	0.151	0.138	0.242	0.098	0.16	0.195	0.372	0.084	0.168	0.158	0.149	0.192	0.281			28	1.252	0.082	0.113	0.077	0.072	0.076	0.534	0.169	0.959	0.084	0.124	0.104	0.143	0.102	0.089	0.085	0.116	0.198	0.267	0.092	0.092
29	0.812	0.09	0.12	0.14	0.159	0.148	0.368	0.148	0.106	0.216	0.094	0.18	0.173	0.329	0.132	0.143	0.625	0.197	0.183	0.154			29	1.239	0.109	0.121	0.076	0.064	0.069	0.437	0.207	0.674	0.083	0.099	0.088	0.094	0.09	0.083	0.08	0.1	0.204	0.266	0.089	0.082
30	0.828	0.101	0.122	0.132	0.205	0.189	0.486	0.146	0.109	0.237	0.088	0.418	0.14	0.327	0.103	0.164	0.153	0.153	0.206	0.155			30	1.308	0.099	0.103	0.053	0.06	0.054	0.603	0.426	0.872	0.081	0.108	0.073	0.069	0.084	0.063	0.063	0.099	0.227	0.196	0.076	0.07
31	1.365	0.133	0.106	0.113	0.203	0.079	0.659	0.145	0.115	0.296	0.091	0.318	0.15	0.496	0.098	0.183	0.132	0.279	0.3	0.308			31	1.538	0.068	0.103	0.056	0.128	0.06	0.415	0.281	1.052	0.06	0.11	0.074	0.067	0.077	0.085	0.073	0.086	0.264	0.266	0.079	0.068
32	1.064	0.118	0.124	0.14	0.214	0.093	0.501	0.177	0.128	0.249	0.106	0.471	0.139	0.349	0.095	0.178	0.146	0.19	0.283	0.251			32	1.317	0.083	0.605	0.077	0.069	0.077	0.638	0.264	1.042	0.079	0.119	0.09	0.09	0.089	0.101	0.101	0.114	0.242	0.257	0.087	0.085
33	1.026	0.1	0.122	0.102	0.209	0.09	0.556	0.167	0.117	0.248	0.096	0.492	0.328	0.376	0.092	0.179	0.166	0.173	0.289	0.125			33	1.255	0.084	0.106	0.073	0.073	0.072	0.505	0.247	0.957	0.08	0.114	0.105	0.092	0.123	0.089	0.084	0.115	0.223	0.199	0.091	0.085
34	0.899	0.103	0.272	0.109	0.195	0.092	0.51	0.267	0.123	0.281	0.107	0.517	0.151	0.342	0.104	0.177	0.137	0.542	0.249	0.22			34	1.147	0.086	0.114	0.072	0.072	0.076	0.497	0.227	0.787	0.073	0.11	0.09	0.095	0.084	0.082	0.086	0.098	0.233	0.218	0.088	0.083
35	1.006	0.118	0.126	0.096	0.202	0.104	0.498	0.159	0.117	0.212	0.098	0.417	0.147	0.218	0.097	0.154	0.127	0.176	0.208	0.125			35	1	0.092	0.108	0.072	0.229	0.078	0.528	0.204	0.836	0.077	0.115	0.094	0.117	0.101	0.109	0.086	0.113	0.245	0.241	0.088	0.097
36	0.922	0.312	0.194	0.115	0.182	0.137	0.597	0.197	0.176	0.216	0.109	0.42	0.398	0.26	0.098	0.203	0.125	0.291	0.262	0.226			36	0.938	0.119	0.154	0.088	1.077	0.104	0.613	0.206	0.77	0.145	0.117	0.166	0.151	0.187	0.143	0.085	0.162	0.28	0.262	0.092	0.135
37	0.967	0.116	0.144	0.108	0.199	0.211	0.681	0.185	0.119	0.976	0.274	0.462	0.176	0.435	0.1	0.214	0.174	0.234	0.281	0.179			37	1.319	0.126	0.149	0.08	0.082	0.114	0.652	0.205	0.816	0.079	0.7	0.15	0.095	0.161	0.085	0.078	0.144	0.325	0.197	0.09	0.094
38	0.72	1.062	0.117	0.112	0.513	0.17	0.582	0.178	0.133	1.137	2.133	0.593	0.562	0.424	0.115	0.156	0.16	0.187	0.242	0.264			38	1.225	0.114	0.18	0.076	0.077	0.142	0.759	0.244	1.113	0.176	0.145	0.119	0.104	0.141	0.115	0.1	0.164	0.246	0.226	0.084	0.094
39	0.637	1.494	0.122	0.447	0.187	0.227	0.444	0.208	0.113	0.301	0.101	0.244	0.346	0.324	0.228	0.172	0.166	0.315	0.208	0.251			39	0.654	0.134	0.132	0.099	0.084	0.161	0.578	0.209	0.581	0.094	0.219	0.091	0.112	0.092	0.089	0.083	0.124	0.212	0.204	0.093	0.14
40	0.716	0.103	0.116	0.095	0.154	0.128	0.472	0.145	0.104	0.225	0.098	0.254	0.12	0.313	0.086	0.186	0.14	0.225	0.177	0.231			40	0.853	0.086	0.123	0.082	0.083	0.133	0.448	0.204	0.679	0.08	0.115	0.097	0.091	0.111	0.084	0.097	0.112	0.238	0.185	0.141	0.085
41	0.626	1.994	0.139	0.148	0.183	0.127	0.489	0.165	0.112	0.236	0.664	0.251	0.134	0.296	0.089	0.155	0.136	0.154	0.218	0.253			41	1.165	0.1	0.1	0.077	0.067	0.074	0.17	0.264	0.757	0.11	0.126	0.112	0.078	0.096	0.077	0.078	0.106	0.216	0.171	0.086	0.076
42	0.707	0.464	0.141	0.492	0.21	0.09	0.474	0.144	0.074	0.222	0.203	0.367	0.137	0.311	0.108	0.14	0.14	0.187	0.219	0.223			42	1.091	0.243	0.085	0.053	0.062	0.053	0.441	0.928	0.798	0.188	0.09	1.299	0.064	0.072	0.062	0.07	0.1	0.207	0.153	0.07	0.059
43	1.067	0.114	0.149	0.229	0.371	0.117	0.63	0.183	0.145	0.274	0.135	0.586	0.284	0.328	0.243	0.203	0.193	0.264	0.3	0.306			43	1.5	0.069	0.105	0.055	0.049	0.059	0.491	0.251	0.982	0.068	0.103	0.084	0.064	0.094	0.074	0.083	0.096	0.235	0.196	0.074	0.081
44	1.188	0.099	0.117	0.109	0.242	0.128	0.733	0.168	0.129	0.266	0.101	0.475	0.134	0.313	0.868	0.187	0.402	0.241	0.306	0.333			44	1.514	0.082	0.121	0.068	0.075	0.077	0.56	0.595	0.944	0.079	0.119	0.091	0.091	0.119	0.088	0.086	0.101	0.266	0.209	0.085	0.088
45	1.01	0.119	0.14	0.114	0.248	0.108	0.582	0.276	0.128	0.282	0.116	0.621	0.176	0.349	0.103	0.193	0.163	0.215	0.312	0.118			45	1.381	0.085	0.115	0.072	0.07	0.078	0.581	0.256	0.859	0.104	0.152	0.091	0.091	0.088	0.084	0.087	0.133	0.311	0.209	0.089	0.083
46	1.055	0.118	0.145	0.105	0.221	0.095	0.671	0.158	0.119	0.332	0.1	0.584	0.132	0.357	0.102	0.175	0.167	0.194	0.269	0.221			46	1.319	0.083	0.111	0.069	0.072	0.079	0.55	0.246	0.97	0.075	0.134	0.088	0.085	0.093	0.083	0.122	0.1	0.262	0.242	0.085	0.082
47	0.836	0.117	1.685	0.138	0.23	0.135	0.514	0.808	0.109	0.185	0.094	0.462	0.124	0.212	0.113	0.146	0.184	0.567	0.364	0.098			47	1.036	0.089	0.098	0.067	0.069	0.07	0.562	0.174	0.748	0.076	0.132	0.098	0.091	0.101	0.088	0.081	0.109	0.229	0.207	0.085	0.082
48	0.798	0.298	1.429	0.283	0.189	0.101	0.414	0.174	0.104	0.189	0.707	0.594	0.647	0.248	0.414	0.192	0.135	0.616	0.249	0.112			48	0.613	0.144	0.169	0.102	0.37	0.369	0.594	0.285	0.67	0.214	0.121	0.151	0.191	0.173	0.163	0.079	0.172	0.247	0.291	0.085	0.146
49	0.806	0.108	0.123	0.241	0.807	0.109	0.5	0.163	0.099	0.236	0.21	0.338	0.199	0.427	0.141	0.208	0.144	0.306	0.188	0.251			49	1.197	0.095	0.121	0.076	0.078	0.087	0.5	0.275	0.656	0.083	3.155	0.099	0.104	0.118	0.076	0.081	0.121	0.197	0.187	0.087	0.093
50	0.947	0.101	0.116	0.122	0.513	0.144	0.563	0.169	0.125	0.291	0.101	0.394	0.148	0.33	0.097	0.225	0.151	0.196	0.229	0.303			50	1.253	1.403	0.118	0.08	0.071	1.379	0.446	0.319	0.714	0.109	3.042	0.092	0.103	0.093	0.082	0.081	0.111	0.178	0.189	0.111	0.086
51	1.016	0.097	0.117	0.091	0.251	0.743	0.51	0.155	0.109	0.232	0.09	0.379	0.131	0.338	0.089	0.176	0.153	0.179	0.228	0.232			51	1.166	0.077	0.111	0.068	0.062	0.076	0.588	0.567	0.702	0.066	0.116	0.097	0.101	0.081	0.074	0.081	0.107	0.209	0.197	0.083	0.083
52	1.007	0.117	0.135	0.149	0.538	0.369	0.548	0.2	0.132	0.234	0.115	0.518	0.199	0.349	0.197	0.2	0.162	0.289	0.325	0.438			52	1.558	0.086	0.125	0.085	0.069	0.08	0.715	0.231	0.877	0.082	0.147	0.194	0.105	0.125	0.099	0.097	0.139	0.332	0.251	0.104	0.095
53	1.194	0.165	0.121	0.145	0.441	0.113	0.737	0.247	0.136	0.23	0.109	0.558	0.515	0.374	0.111	0.229	0.168	0.24	0.319	0.379			53	1.637	0.084	0.113	0.08	0.07	0.141	0.637	0.389	0.988	0.131	0.139	0.089	0.092	0.12	0.088	0.083	0.145	0.265	0.161	0.089	0.084
54	0.94	0.115	0.124	0.113	0.261	0.089	0.505	0.165	0.112	0.241	0.104	0.889	0.138	0.349	0.115	0.172	0.149	0.197	0.261	0.263			54	2.09	0.06	0.088	0.057	0.045	0.052	0.59	0.203	0.791	0.067	0.102	0.087	0.061	0.062	0.071	0.068	0.097	0.2	0.159	0.069	0.056
55	0.815	0.104	0.121	0.134	0.229	0.08	0.533	0.153	0.107	0.243	0.088	0.356	0.167	0.291	0.149	0.162	0.142	0.191	0.219	0.259			55	1.349	0.075	0.106	0.061	0.055	0.057	0.576	0.202	0.76	0.069	0.101	0.076	0.068	0.083	0.07	0.071	0.101	0.222	0.157	0.093	0.064
56	0.678	0.119	0.161	0.114	0.187	0.148	0.389	0.152	0.114	0.232	0.11	0.279	0.143	0.324	0.147	0.142	0.141	0.165	0.145	0.13			56	0.849	0.077	0.107	0.077	0.069	0.085	0.569	0.196	0.547	0.077	0.102	0.095	0.086	0.081	0.08	0.088	0.099	0.18	0.156	0.081	0.078
57	0.606	0.11	0.121	0.24	0.184	0.255	0.431	0.161	0.111	0.233	0.099	0.347	0.303	0.349	0.21	0.15	0.14	0.772	0.191	0.194			57	1.021	0.087	0.098	0.078	0.077	0.073	0.616	0.168	0.581	0.087	0.111	0.099	0.094	0.134	0.085	0.084	0.111	0.21	0.172	0.087	0.082
58	0.769	0.106	0.109	0.101	0.181	0.092	0.415	0.142	0.877	0.346	0.088	0.366	0.116	0.329	0.089	0.14	0.156	0.163	0.177	0.086			58	1.07	0.082	0.098	0.071	0.079	0.082	0.588	0.154	0.695	0.076	0.11	0.085	0.081	0.084	0.077	0.081	0.092	0.191	0.177	0.082	0.073
59	0.929	0.115	0.129	0.115	0.22	0.086	0.535	0.733	0.424	0.211	0.1	0.498	0.139	0.223	0.145	0.158	0.147	0.178	0.166	0.087			59	1.222	0.085	0.095	0.066	0.066	0.076	0.65	0.266	0.798	0.08	0.124	0.087	0.105	0.109	0.088	0.093	0.11	0.231	0.231	0.11	0.09
60	0.921	0.356	0.231	0.107	0.217	0.11	1.294	0.177	0.993	0.281	0.103	0.751	0.183	0.254	0.101	0.185	0.135	0.163	0.227	0.184			60	1.008	0.117	0.133	0.07	0.08	0.087	0.651	0.158	0.745	0.124	0.133	0.15	0.145	0.155	0.126	0.094	0.159	0.25	0.259	0.085	0.148
61	0.778	0.109	0.114	0.098	0.209	0.392	0.494	0.225	0.108	0.239	0.099	0.364	0.134	0.297	0.134	0.379	0.198	0.179	0.175	0.211			61	0.93	0.093	0.108	0.076	0.069	0.074	0.752	0.13	0.707	0.076	0.121	0.139	0.105	0.143	0.087	0.082	0.104	0.217	0.184	0.076	0.105
62	0.672	0.117	0.153	0.096	0.169	0.103	0.557	0.162	0.109	0.247	0.104	0.298	0.134	0.334	0.092	0.161	0.21	0.176	0.189	0.214			62	0.712	0.376	0.098	0.077	0.08	0.108	0.519	0.146	0.621	0.083	0.118	0.266	0.095	0.091	0.155	0.082	0.102	0.193	0.137	0.079	0.083
63	0.767	0.097	0.117	0.101	0.184	0.099	0.432	0.169	0.094	0.225	0.096	0.284	0.149	0.323	0.093	0.49	0.359	0.175	0.692	0.209			63	0.693	0.08	0.095	0.072	0.069	0.075	0.479	0.137	0.665	0.065	0.104	0.156	0.094	0.094	0.078	0.076	0.097	0.182	0.186	0.079	0.082
64	0.992	0.107	0.13	0.108	0.217	0.108	0.603	0.162	0.119	0.246	0.103	0.443	0.151	0.337	0.094	0.43	0.156	0.165	0.244	0.29			64	1.323	0.082	0.108	0.09	0.07	0.075	0.614	0.264	0.91	0.074	0.088	0.151	0.114	0.104	0.085	0.083	0.129	0.252	0.363	0.087	0.092
65	1.01	0.117	0.135	0.101	0.223	0.143	0.635	0.161	0.126	0.244	0.096	0.396	0.136	0.336	0.097	1.024	0.613	0.198	0.291	0.323			65	1.426	0.075	0.103	0.27	0.109	0.11	0.574	0.275	1.072	0.073	0.111	0.134	0.131	0.101	0.081	0.077	0.094	0.254	0.215	0.084	0.084
66	1.069	0.089	0.127	0.124	0.208	0.105	0.529	0.172	0.114	0.237	0.091	0.414	0.13	0.328	0.088	0.253	0.139	0.187	0.279	0.303			66	1.335	0.057	0.101	0.053	0.162	0.091	0.585	0.271	0.953	0.06	0.1	0.193	0.074	0.106	0.066	0.067	0.17	0.225	0.21	0.076	0.072
67	1.149	0.096	0.116	0.125	0.227	0.089	0.714	0.28	0.16	0.266	0.144	0.455	0.137	0.318	0.094	0.213	0.152	0.193	0.285	0.174			67	1.5	0.057	0.099	0.06	0.068	0.089	0.623	0.264	1.103	0.121	0.095	0.07	0.069	0.065	0.069	0.069	0.094	0.241	0.193	0.075	0.068
68	1.068	0.114	0.124	0.162	0.235	0.83	0.808	0.195	0.135	0.264	0.103	0.462	0.204	0.373	0.097	0.223	0.179	0.294	0.327	0.339			68	1.424	0.088	0.121	0.082	0.12	0.078	0.55	0.269	1.022	0.087	0.111	0.096	0.107	0.14	0.086	0.1	0.12	0.23	0.193	0.092	0.082
69	0.8	0.104	0.144	1.288	0.21	0.1	0.525	0.125	0.112	0.238	0.098	0.445	0.253	0.294	0.715	0.257	0.162	0.219	0.256	0.248			69	1.437	0.098	0.108	0.19	0.08	0.112	0.509	0.187	1.238	0.111	0.111	0.094	0.096	0.088	0.09	0.083	0.101	0.213	0.19	0.099	0.09
70	1.362	0.158	0.382	0.513	0.494	0.132	0.55	0.228	0.147	0.288	0.15	0.661	0.431	0.355	0.294	0.167	0.283	0.585	0.436	0.36			70	1.233	0.126	0.133	0.084	0.086	0.161	0.549	0.222	0.794	0.095	0.143	0.112	0.102	0.078	0.103	0.106	0.116	0.262	0.221	0.101	0.111
71	0.592	0.137	0.164	0.274	0.322	0.129	0.676	0.18	0.129	0.705	0.152	0.632	0.216	0.236	0.598	0.091	0.177	3.104	0.271	0.211			71	1.058	0.106	0.112	0.081	0.088	0.083	0.552	0.211	0.747	0.086	0.119	0.182	0.127	0.171	0.103	0.095	0.125	0.223	0.225	0.129	0.099
72	0.881	0.364	0.208	0.127	0.226	0.113	0.348	0.236	0.124	0.204	0.109	0.965	0.223	0.273	0.104	0.176	0.155	0.714	0.366	0.313			72	1.142	0.115	0.141	0.086	0.078	0.105	0.655	0.233	0.852	0.133	0.141	0.181	0.21	0.176	0.137	0.084	0.175	0.285	0.218	0.1	0.133
73	1.016	0.117	0.324	0.109	0.228	0.184	1.36	0.17	0.141	0.24	0.137	0.559	0.155	0.332	0.258	0.183	0.177	0.169	0.286	0.327			73	1.074	0.094	0.14	0.076	0.218	0.084	0.705	0.242	0.941	0.076	0.099	0.114	0.093	0.158	0.097	0.077	0.153	0.236	0.248	0.087	0.275
74	0.84	0.112	0.189	0.334	0.188	1.561	1.007	0.225	0.226	0.262	0.107	0.332	0.176	0.359	0.131	0.168	0.525	0.246	0.173	0.249			74	0.719	0.099	0.125	0.087	0.08	0.082	0.587	0.138	0.626	0.074	0.161	0.141	0.118	0.111	0.093	0.083	0.493	0.22	0.19	0.09	0.143
75	0.821	0.095	0.485	3.339	0.157	0.097	0.464	0.647	0.112	0.513	0.104	0.495	3.227	0.642	0.294	0.375	0.156	1.293	0.159	0.474			75	0.618	0.078	0.133	0.077	1.852	0.08	2.61	1.742	0.429	2.248	0.315	3.028	2.222	0.077	3.16	0.081	2.491	0.187	0.248	0.247	0.165
76	0.72	0.115	0.266	3.458	1.685	0.124	0.348	0.684	0.111	0.297	0.136	2.416	3.317	0.727	1.74	0.525	0.199	3.335	0.793	3.075			76	2.447	1.163	1.373	1.613	2.898	0.14	3.076	1.721	0.884	1.725	0.747	3.023	3.189	0.092	3.189	0.092	3.174	3.117	2.192	2.788	0.194
77	0.633	0.101	0.132	2.57	0.131	0.093	0.306	0.158	0.122	0.223	0.311	0.249	1.725	0.307	0.093	0.137	0.126	0.731	0.136	2.996			77	0.408	0.145	0.1	0.386	2.285	0.076	0.736	0.764	0.85	0.201	0.274	0.102	2.578	0.166	0.19	0.826	1.44	1.945	0.239	0.516	0.848
78	0.828	0.087	0.153	0.586	0.184	0.099	0.488	0.151	0.096	0.224	0.078	0.402	0.132	0.489	0.077	0.175	0.137	0.192	0.196	0.236			78	1.108	0.081	0.096	0.054	0.052	0.053	0.593	0.286	0.787	0.15	0.19	0.076	0.12	0.067	0.062	0.057	0.083	0.169	0.157	0.075	0.063
79	0.874	0.081	0.107	2.006	0.183	0.076	0.409	0.149	0.17	0.232	0.166	0.426	0.19	0.334	0.227	0.303	0.134	0.283	0.213	0.267			79	1.121	0.191	0.098	0.102	0.224	0.115	0.525	0.22	0.754	0.268	0.143	0.108	0.245	0.072	0.282	0.17	0.105	0.463	0.182	0.15	0.113
80	1.065	0.107	0.126	0.099	0.23	0.116	0.704	0.175	0.16	0.251	0.097	0.482	0.134	0.328	0.099	0.183	0.159	0.236	0.252	0.21			80	1.649	0.693	0.811	0.495	0.642	0.624	1.088	0.856	1.23	0.701	0.107	0.096	0.129	0.125	0.086	0.084	0.127	0.231	0.204	0.086	0.085
81	0.658	0.119	0.125	0.128	0.174	0.091	0.443	0.152	0.109	0.281	0.106	0.372	0.136	0.357	0.144	0.154	0.139	0.179	0.173	0.212			81	0.933	0.085	0.104	0.074	0.081	0.12	0.761	0.137	0.584	0.146	0.109	0.1	0.092	0.083	0.087	0.087	0.117	0.195	0.193	0.091	0.084
82	0.634	0.134	0.12	0.556	0.551	0.136	0.465	0.147	1.041	0.314	0.112	0.286	0.494	0.723	1.453	0.347	0.768	2.041	0.252	0.467			82	0.336	0.106	0.529	0.086	0.103	0.101	0.43	0.358	0.446	0.123	0.202	0.092	0.207	0.118	0.097	0.106	0.133	0.324	0.32	0.106	0.09
83	0.595	0.13	0.121	0.226	0.135	0.09	0.299	0.134	0.103	0.177	0.103	0.282	0.331	0.221	0.202	0.085	0.121	1.234	0.158	0.228			83	0.27	0.088	0.096	0.074	0.072	0.083	0.279	0.093	0.341	0.09	0.096	0.098	0.157	0.119	0.093	0.09	0.134	0.137	0.182	0.08	0.075
84	0.522	0.408	0.303	0.193	0.142	0.136	0.314	0.262	0.107	0.197	0.111	0.745	0.254	0.251	0.124	0.134	0.125	0.461	0.298	0.227			84	0.189	0.145	0.167	0.091	0.09	0.125	0.355	0.109	0.35	0.152	0.128	0.203	0.233	0.188	0.167	0.085	0.188	0.167	0.232	0.101	0.133
85	0.793	0.127	0.138	0.138	0.155	0.162	0.527	0.187	0.107	0.32	0.113	0.274	0.131	0.348	0.31	0.234	0.188	0.293	0.484	0.293			85	0.553	0.089	0.211	0.108	0.082	0.085	0.575	0.183	0.484	0.102	0.111	0.265	0.099	0.429	0.107	0.086	0.191	0.235	0.294	0.094	0.094
86	0.499	0.114	0.167	0.107	0.153	0.105	0.307	2.136	0.125	0.378	0.109	0.247	0.303	0.516	0.116	0.17	0.157	0.177	0.297	0.17			86	0.26	0.096	0.156	0.825	0.072	0.082	0.309	0.105	0.326	0.079	0.132	0.116	0.092	0.24	0.083	0.08	0.139	0.138	0.207	0.088	0.081
87	0.52	0.109	0.146	0.123	0.141	0.402	0.304	0.147	0.117	0.224	0.094	0.235	0.127	0.315	0.086	0.146	0.195	0.123	0.148	0.159			87	0.301	0.078	0.094	0.648	0.07	0.075	0.276	0.098	0.417	0.071	0.094	0.105	0.078	0.628	0.083	0.077	0.111	0.161	0.205	0.083	0.081
88	0.688	0.122	0.147	0.195	0.216	0.128	0.487	0.185	0.122	0.204	0.1	0.382	0.345	0.26	0.143	0.175	0.199	0.223	0.221	0.253			88	0.846	0.087	0.107	0.086	1.011	0.081	0.434	0.147	0.598	0.092	0.112	0.125	0.099	0.084	0.092	0.087	0.12	0.23	0.258	0.11	0.092
89	0.768	0.113	0.144	0.155	0.21	0.15	0.449	0.18	0.189	0.263	0.099	0.356	0.179	0.342	0.129	0.098	0.154	0.24	0.202	0.272			89	0.91	0.083	0.109	0.074	2.526	0.072	0.517	0.133	0.616	0.084	0.147	0.181	0.097	0.083	0.083	0.081	0.105	0.228	0.21	0.092	0.083
90	0.907	0.095	0.121	0.109	0.185	0.085	0.558	0.157	0.116	0.225	0.091	0.387	0.121	0.351	0.081	0.158	0.142	0.186	0.213	0.22			90	1.144	0.056	0.097	0.181	0.051	0.059	0.532	0.469	1.711	0.379	0.086	0.15	0.254	0.062	0.073	0.053	0.098	0.196	0.184	0.065	0.068
91	1.355	0.098	0.117	0.098	0.201	0.361	0.656	0.149	0.104	0.257	0.091	0.51	0.174	0.39	0.09	0.179	0.153	0.212	0.231	0.198			91	1.131	0.062	0.098	0.101	0.056	0.66	0.65	0.235	0.906	0.061	0.094	0.075	0.102	0.104	0.085	0.064	0.153	0.202	0.165	0.073	0.069
92	1.324	0.113	0.185	0.114	0.297	0.116	0.889	0.166	0.126	0.257	0.106	0.574	0.147	0.375	0.112	0.194	0.203	0.31	0.321	0.276			92	1.453	0.11	0.133	0.105	2.502	0.08	0.601	0.296	0.987	0.095	0.123	0.126	0.174	0.128	0.1	0.092	0.147	0.215	0.158	0.097	0.103
93	0.986	0.14	0.267	0.509	0.301	0.103	0.823	0.183	0.137	0.307	0.128	0.601	0.297	0.423	0.162	0.152	0.28	0.268	0.304	0.28			93	1.547	0.094	0.128	0.105	0.084	0.082	0.724	0.296	0.913	0.69	0.115	0.171	0.208	0.502	0.114	0.101	0.146	0.259	0.232	0.09	0.102
94	0.894	1.697	0.193	0.343	0.251	0.096	0.721	0.153	0.125	0.223	0.25	0.479	0.303	0.472	0.168	0.138	0.201	0.611	0.292	0.265			94	1.217	0.09	0.115	0.072	0.076	0.085	0.606	0.224	0.846	0.081	0.117	0.145	0.227	0.12	0.123	0.111	0.138	0.223	0.237	0.09	0.094
95	0.83	0.133	0.18	0.171	0.284	0.135	0.69	0.154	0.147	0.216	0.166	0.884	0.287	0.225	0.111	0.108	0.173	0.197	0.214	0.18			95	1.171	0.149	0.178	0.074	0.078	0.086	0.578	0.245	0.766	0.108	0.112	0.114	0.319	0.177	0.138	0.212	0.23	0.267	0.303	0.087	0.112
96	0.782	0.48	0.529	0.33	0.203	0.155	0.542	0.446	0.279	0.203	0.15	1.296	0.723	0.275	0.264	0.36	0.154	0.244	0.312	0.265			96	0.779	0.238	0.448	0.172	0.137	0.164	0.735	0.293	0.746	0.255	0.159	0.256	0.588	0.505	0.412	0.14	0.386	0.251	0.35	0.116	0.173
97	1.042	0.208	0.279	0.154	0.202	0.116	0.494	0.234	0.11	0.239	0.207	0.389	0.331	0.227	0.101	0.16	0.161	0.296	0.331	0.248			97	0.941	0.104	0.23	0.171	0.097	0.162	0.551	0.301	0.692	0.164	0.106	0.117	0.338	0.098	0.285	0.156	0.309	0.303	0.175	0.093	0.089
98	0.851	0.159	0.132	0.123	0.182	0.109	0.55	1.196	0.123	0.198	0.102	0.397	0.153	0.212	0.097	0.171	0.154	0.153	0.199	0.265			98	0.912	0.098	0.179	0.083	0.097	0.083	0.531	0.17	0.735	0.098	0.109	0.097	0.09	0.083	0.21	0.092	0.134	0.261	0.155	0.091	0.094
99	0.986	0.121	0.189	0.142	0.197	0.1	0.5	0.281	0.105	0.191	0.099	0.406	0.138	0.21	0.101	0.19	0.151	0.159	0.224	0.284			99	1.154	0.113	0.107	0.075	0.076	0.077	0.531	0.188	0.702	0.072	0.134	0.083	0.08	0.087	0.092	0.087	0.105	0.27	0.149	0.087	0.085
100	1.007	0.135	0.175	0.094	0.186	0.11	1.019	0.239	0.137	0.191	0.105	0.382	0.143	0.208	0.103	0.211	0.151	0.152	0.237	0.3			100	1.229	0.153	0.125	0.084	0.081	0.082	0.633	0.205	0.829	0.081	0.113	0.096	0.085	0.084	0.09	0.087	0.104	0.233	0.183	0.086	0.089
101	1.132	0.123	0.15	0.115	0.226	0.102	0.669	0.19	0.145	0.319	0.099	0.425	0.142	0.218	0.105	0.198	0.16	0.18	0.273	0.311			101	1.408	0.15	0.193	0.08	0.073	0.081	0.806	0.222	0.918	0.08	0.173	0.173	0.079	0.082	0.081	0.079	0.11	0.239	0.187	0.08	0.081
102	0.887	0.21	0.1	0.107	0.157	0.091	1.21	0.144	0.112	0.161	0.122	0.17	0.113	0.167	0.08	0.165	0.124	0.113	0.227	0.235			102	0.722	0.064	0.819	0.086	0.403	0.355	0.604	0.12	0.756	0.395	0.07	0.19	0.054	0.053	0.067	0.651	0.078	1.182	0.139	0.208	0.054
103	0.898	0.133	0.219	0.61	0.179	0.091	0.418	0.155	0.123	0.144	0.091	0.396	0.568	0.133	0.353	0.113	0.134	0.246	0.263	0.298			103	0.859	0.078	0.089	0.07	0.065	0.062	0.682	0.15	0.649	0.081	0.082	0.085	0.073	0.061	0.082	0.075	0.096	0.181	0.156	0.071	0.066
104	0.98	0.129	0.252	0.147	0.214	0.106	0.504	0.173	0.113	0.164	0.103	0.417	0.198	0.135	0.138	0.225	0.146	0.156	0.252	0.338			104	1.039	0.09	0.138	0.089	0.103	0.091	0.621	0.161	0.921	0.083	0.1	0.094	0.087	0.087	0.108	0.087	0.109	0.221	0.174	0.087	0.083
105	0.933	0.126	0.119	0.114	0.204	0.111	0.477	0.162	0.104	0.151	0.107	0.4	0.142	0.13	0.112	0.184	0.142	0.136	0.26	0.278			105	0.959	0.118	0.116	0.083	0.194	0.079	0.614	0.179	0.759	0.076	0.102	0.095	0.101	0.094	0.12	0.089	0.111	0.211	0.18	0.086	0.085
106	0.863	0.125	0.108	0.1	0.195	0.113	0.454	0.18	0.109	0.171	0.109	0.376	0.128	0.132	0.099	0.171	0.14	0.132	0.233	0.281			106	0.878	0.091	0.119	0.085	0.079	0.117	0.594	0.142	0.686	0.081	0.097	0.1	0.102	0.09	0.124	0.088	0.114	0.235	0.083	0.106	0.086
107	0.692	0.172	0.366	0.102	0.18	0.104	0.324	0.144	0.181	0.172	0.147	0.269	0.128	0.243	0.094	0.129	0.143	0.123	0.154	0.239			107	0.423	0.156	0.189	0.159	0.147	0.137	0.601	0.112	0.444	0.121	0.127	0.192	0.17	0.133	0.119	0.267	0.17	0.21	0.178	0.102	0.088
108	0.875	0.527	0.608	0.127	0.527	0.112	0.489	0.227	0.373	0.173	0.471	0.692	0.201	0.172	0.267	0.134	0.503	0.267	0.242	0.852			108	0.656	0.368	0.44	0.39	0.378	0.23	0.97	0.294	0.667	0.292	0.345	0.483	0.342	0.478	0.337	0.481	0.228	0.309	0.363	0.101	0.093
109	1.087	0.139	0.204	0.242	0.195	0.117	0.596	0.167	0.255	0.305	0.165	0.396	0.325	0.227	0.233	0.302	0.145	0.212	0.27	0.264			109	0.751	0.112	0.164	0.118	0.096	0.133	0.613	0.172	0.785	0.112	0.157	0.082	0.096	0.098	0.089	0.122	0.125	0.276	0.195	0.086	0.114
110	0.911	0.113	0.324	0.138	0.146	0.1	0.34	0.199	0.142	0.284	0.096	0.404	0.23	0.188	0.113	0.157	0.156	0.327	0.168	0.193			110	0.274	0.113	0.153	0.162	0.089	0.081	0.455	0.132	0.593	0.079	0.186	0.081	0.08	0.077	0.088	0.117	0.149	0.207	0.156	0.084	0.137
111	0.956	3.04	0.123	0.093	0.179	0.093	0.435	0.147	0.153	0.196	0.093	0.34	0.132	0.244	0.089	0.176	0.144	0.152	0.189	0.194			111	2.988	0.089	0.102	0.076	0.073	0.079	0.561	0.157	0.737	0.101	0.16	0.079	0.075	0.084	0.078	0.098	0.094	0.25	0.169	0.081	0.087
112	0.575	2.66	0.113	0.097	0.18	0.095	0.474	0.159	0.21	0.216	0.098	0.337	0.135	0.209	0.09	0.184	0.142	0.17	0.19	0.198			112	1.062	0.106	0.111	0.079	0.079	0.086	0.608	0.159	0.762	0.077	0.098	0.086	0.079	0.127	0.083	0.086	0.11	0.228	0.18	0.089	0.083
113	1.007	0.12	0.112	0.098	0.195	0.094	0.528	0.16	0.318	0.208	0.101	0.329	0.138	0.196	0.098	0.174	0.135	0.157	0.207	0.196			113	1.165	0.09	0.11	0.078	0.073	0.083	0.661	0.178	0.832	0.08	0.096	0.081	0.122	0.072	0.078	0.081	0.112	0.187	0.186	0.081	0.082
114	1.019	0.102	0.091	0.092	0.178	0.081	0.535	0.146	0.097	0.205	0.082	0.368	0.132	0.173	0.094	0.203	0.228	0.186	0.157	0.169			114	0.756	0.079	0.096	0.064	0.053	0.066	0.916	0.163	0.781	0.052	0.114	0.061	0.062	0.059	0.057	0.09	0.083	0.213	0.16	0.061	0.06
115	0.966	0.102	0.098	0.097	0.154	0.235	0.572	0.147	0.071	0.162	0.087	0.394	0.123	0.119	0.088	0.16	0.132	0.132	0.164	0.16			115	1.43	0.164	0.105	0.062	0.121	0.15	0.625	0.096	0.86	0.066	0.083	0.063	0.091	0.062	0.065	0.056	0.083	0.211	0.169	0.06	0.063
116	1.228	0.318	0.116	0.112	0.207	0.106	0.675	0.165	0.121	0.186	0.111	0.427	0.195	0.145	0.113	0.217	0.164	0.157	0.262	0.208			116	1.102	0.472	0.124	0.101	0.084	0.1	0.363	0.234	0.867	0.083	0.099	0.083	0.078	0.086	0.093	0.094	0.106	0.903	0.185	0.087	0.084
117	0.942	0.191	0.111	0.302	0.223	0.104	0.511	0.16	0.116	0.174	0.102	0.391	0.225	0.135	0.1	0.188	0.238	0.185	0.207	2.193			117	0.953	0.084	0.113	0.096	0.116	0.107	0.466	0.168	0.709	0.111	0.103	0.104	0.083	0.083	0.085	0.117	0.11	2.924	0.178	0.087	0.081
118	0.516	0.115	0.106	0.244	0.161	0.108	0.387	0.142	0.104	0.172	0.099	1.169	0.125	0.14	0.095	0.149	0.14	0.151	0.165	0.146			118	0.741	0.093	0.102	0.083	0.079	0.098	0.496	0.144	0.636	0.077	0.094	0.079	0.075	0.095	0.088	0.094	0.099	0.191	0.149	0.08	0.076
119	0.674	0.123	0.157	0.09	0.155	0.094	0.316	0.135	0.439	0.143	0.097	0.245	0.117	0.148	0.089	0.138	0.118	0.108	0.144	0.146			119	0.539	0.115	0.106	0.094	0.074	0.103	0.54	0.131	0.518	0.085	0.104	0.094	0.11	0.089	0.09	0.104	0.131	0.194	0.159	0.083	0.085
120	0.679	0.349	0.454	0.094	0.289	0.116	0.373	0.173	0.2	0.135	0.171	0.428	0.154	0.419	0.145	0.222	0.264	0.234	0.166	0.256			120	0.554	0.183	0.2	0.158	0.166	0.154	0.21	0.186	0.643	0.144	0.203	0.207	0.168	0.199	0.148	0.204	0.183	0.256	0.204	0.084	0.086
121	0.693	0.1	0.122	0.097	0.144	0.096	0.304	0.139	0.096	0.179	0.102	0.264	0.117	0.179	0.084	0.246	0.13	0.125	0.157	0.17			121	0.528	0.096	0.126	0.08	0.079	0.119	0.436	0.095	0.438	0.087	0.081	0.171	0.079	0.077	0.144	0.076	0.222	0.175	0.222	0.08	0.108
122	2.048	0.132	0.128	0.162	0.201	0.106	0.381	0.174	0.473	0.208	0.099	0.274	2.148	0.183	0.111	0.151	0.17	0.171	0.206	0.234			122	1.121	0.094	0.096	0.082	0.086	0.797	0.506	0.116	0.527	0.077	2.857	3.226	0.151	0.078	0.408	0.76	0.11	1.651	0.672	1.762	0.106
123	0.703	0.222	0.121	3.163	0.478	0.101	0.323	0.327	0.17	0.194	0.094	0.351	0.247	0.254	0.124	0.145	0.123	1.243	1.411	0.578			123	2.876	2.009	0.17	0.277	0.417	1.248	0.704	0.977	0.425	0.415	0.173	3.038	0.156	0.079	0.566	0.119	2.838	0.71	0.373	2.908	0.261
124	1.3	0.434	0.127	1.014	2.266	0.211	0.517	0.494	0.208	0.322	0.152	0.596	0.433	0.255	0.543	0.215	0.364	0.445	0.864	2.263			124	2.835	1.386	0.226	1.301	0.24	2.585	0.674	2.004	0.656	0.905	2.79	3.228	0.468	0.238	0.691	0.126	1.121	1.462	1.978	2.534	2.86
125	0.697	0.16	0.109	1.211	1.673	0.288	0.432	0.354	0.122	0.271	0.108	0.359	0.368	0.221	0.394	0.16	0.167	0.278	0.239	0.943			125	1.273	0.27	0.122	0.11	0.107	1.287	0.466	1.176	0.43	0.689	0.623	2.536	0.182	0.165	0.198	0.095	0.486	0.339	0.397	0.334	1.135
126	0.812	0.09	0.104	0.096	0.143	0.211	0.376	0.179	0.094	0.171	0.08	0.252	0.111	0.157	0.075	0.132	0.113	0.111	0.143	0.185			126	0.459	0.069	0.1	0.068	0.697	0.127	0.498	0.12	0.583	0.049	0.068	0.062	0.058	0.083	0.067	0.071	0.095	0.184	0.138	0.065	0.062
127	0.785	0.105	0.101	0.295	0.166	0.111	0.42	0.166	0.096	0.147	0.088	0.3	0.426	0.138	0.282	0.161	0.108	0.165	0.202	0.215			127	0.862	0.069	0.086	0.085	0.051	0.059	0.556	0.125	0.855	0.058	0.088	0.072	0.059	0.061	0.131	0.059	0.077	0.183	0.096	0.07	0.066
128	0.984	0.114	0.115	0.13	0.188	0.101	0.55	0.156	0.131	0.178	0.099	0.371	0.172	0.136	0.125	0.169	0.131	0.156	0.24	0.252			128	1.018	0.087	0.111	0.08	0.075	0.085	0.197	0.169	0.797	0.076	0.098	0.087	0.088	0.08	0.115	0.085	0.108	0.233	0.196	0.083	0.09
129	0.881	0.108	0.1	0.18	0.19	0.088	0.473	0.148	0.104	0.153	0.094	0.339	0.237	0.13	0.181	0.195	0.128	0.168	0.236	0.207			129	1.064	0.083	0.109	0.075	0.083	0.084	0.395	0.132	0.726	0.075	0.098	0.083	0.079	0.079	0.101	0.086	0.107	0.263	0.188	0.08	0.088
130	0.758	0.095	0.095	0.097	0.177	0.121	0.435	0.137	0.093	0.14	0.09	0.314	0.127	0.119	0.094	0.173	0.124	0.145	0.221	0.201			130	0.703	0.085	0.096	0.076	0.069	0.117	0.492	0.111	0.593	0.071	0.097	0.084	0.078	0.086	0.096	0.079	0.101	0.189	0.16	0.076	0.08
131	0.794	0.101	0.134	0.237	0.228	0.099	0.455	0.141	0.119	0.319	0.116	0.403	0.186	0.181	0.108	0.185	0.144	0.13	0.187	0.328			131	0.761	0.133	0.111	0.084	0.076	0.101	0.463	0.12	0.767	0.08	0.097	0.12	0.091	0.1	0.122	0.094	0.134	0.43	0.208	0.097	0.095
132	1.122	0.213	0.275	0.235	0.344	0.128	0.891	0.258	0.192	0.234	0.177	0.622	0.304	0.214	0.286	0.293	0.255	0.349	0.293	0.355			132	0.843	0.194	0.202	0.15	0.116	0.139	0.506	0.196	0.777	0.11	0.189	0.171	0.166	0.156	0.138	0.168	0.194	0.466	0.284	0.094	0.103
133	0.502	0.132	1.895	0.568	0.154	0.088	0.428	0.146	0.097	0.197	0.096	0.356	0.142	0.196	0.09	0.274	0.168	0.159	0.172	0.207			133	0.777	0.169	0.144	0.091	0.087	0.183	0.64	0.146	0.629	0.235	0.082	0.081	0.085	0.092	0.079	0.092	0.135	0.227	0.216	0.084	0.082
134	0.803	0.12	0.342	0.107	0.179	0.1	0.386	0.164	0.111	0.182	0.096	0.318	0.135	0.23	0.095	0.162	0.185	0.159	0.18	0.224			134	0.8	0.095	0.098	0.078	0.08	0.243	0.603	0.142	0.58	0.174	0.086	0.079	0.082	0.08	0.09	0.094	0.127	0.211	0.168	0.084	0.087
135	0.765	0.294	0.109	0.12	0.161	0.091	0.326	0.149	0.089	0.171	0.088	0.284	0.162	0.184	0.362	0.184	0.139	0.141	0.159	0.204			135	0.596	0.085	0.093	0.076	0.074	0.139	0.528	0.116	0.5	0.131	0.082	0.074	0.072	0.083	0.077	0.084	0.111	0.178	0.155	0.082	0.08
136	0.843	0.123	0.114	0.138	0.175	0.097	0.439	0.155	0.105	0.183	0.095	0.303	0.179	0.2	0.109	0.159	0.147	0.156	0.19	0.241			136	1.413	0.088	0.099	0.083	0.117	0.207	0.57	0.154	0.685	0.077	0.094	0.091	0.082	0.079	0.085	0.09	0.127	0.202	0.176	0.089	0.085
137	0.923	0.131	1.272	0.092	0.201	0.087	0.525	0.173	0.104	0.192	0.093	0.359	0.126	0.184	0.088	0.174	0.138	0.149	0.22	0.261			137	1.31	0.083	0.099	0.074	0.069	0.087	0.528	0.17	0.774	0.077	0.095	0.188	0.077	0.088	0.079	0.075	0.121	0.204	0.182	0.09	0.134
138	0.904	0.114	0.094	0.256	0.168	0.081	0.491	0.15	0.097	0.181	0.087	0.363	0.122	0.173	0.086	0.153	0.121	0.163	0.192	0.29			138	0.835	0.069	0.077	0.054	0.429	0.059	0.543	0.148	0.769	0.07	0.08	0.13	0.069	0.067	0.095	0.067	0.097	0.186	0.159	0.074	0.081
139	0.946	0.118	0.103	0.606	0.267	0.086	0.533	0.191	0.11	0.208	0.162	0.85	0.18	0.142	0.146	0.151	0.133	0.266	0.229	0.298			139	1.21	1.464	0.094	0.147	0.142	0.088	0.594	0.162	0.806	0.081	0.137	1.392	0.187	0.069	0.177	0.1	0.113	0.435	0.165	0.1	0.148
140	0.754	0.123	0.169	0.453	0.213	0.109	0.443	0.161	0.12	0.177	0.116	0.38	0.555	0.143	0.577	0.169	0.142	0.182	0.233	0.226			140	1.076	0.095	0.1	0.086	0.151	0.08	0.512	0.152	0.645	0.074	0.103	0.108	0.081	0.08	0.086	0.083	0.114	0.212	0.159	0.093	0.082
141	0.642	0.115	0.151	0.24	0.17	0.097	0.367	0.152	0.112	0.151	0.11	0.292	0.142	0.129	0.182	0.173	0.123	0.178	0.173	0.197			141	0.66	0.113	0.098	0.108	0.102	0.09	0.519	0.122	0.58	0.084	0.107	0.106	0.112	0.078	0.128	0.096	0.112	0.246	0.152	0.099	0.123
142	0.618	0.098	0.139	0.084	0.143	0.087	0.469	0.129	0.095	0.145	0.092	0.251	0.116	0.127	0.082	0.138	0.114	0.138	0.148	0.16			142	0.51	0.079	0.084	0.075	0.44	0.08	0.509	0.117	0.45	0.07	0.084	0.074	0.076	0.072	0.087	0.08	0.133	0.165	0.143	0.084	0.218
143	0.594	0.106	0.11	0.103	0.169	0.092	0.373	0.138	0.104	0.142	0.101	0.294	0.115	0.149	0.087	0.121	0.121	0.136	0.153	0.142			143	0.506	0.089	0.085	0.079	0.068	0.089	0.325	0.118	0.468	0.075	0.087	0.087	0.083	0.093	0.091	0.086	0.189	0.195	0.162	0.093	0.104
144	0.615	0.263	0.215	0.096	0.245	0.092	0.44	0.182	0.187	0.139	0.133	0.246	0.116	0.165	0.113	0.137	0.166	0.254	0.219	0.257			144	0.612	0.142	0.132	0.119	2.042	0.153	0.578	0.165	2.367	0.116	0.157	0.122	0.151	0.164	0.102	2.451	0.181	0.237	0.201	0.094	0.3
145	0.813	0.121	0.113	0.525	2.478	0.104	0.473	0.157	0.121	0.219	0.096	0.309	0.123	0.4	0.094	0.156	0.138	0.155	0.375	0.186			145	2.975	0.092	0.34	0.082	0.432	0.151	0.604	0.167	0.682	0.105	1.333	0.535	3.192	0.097	0.092	0.135	0.194	0.236	0.198	0.08	0.101
146	0.815	0.125	0.136	3.21	3.372	0.122	0.32	0.208	0.105	0.192	0.804	0.252	0.337	0.428	0.091	0.147	0.186	3.031	1.932	0.166			146	3.358	1.146	1.288	1.536	2.436	1.712	1.938	3.175	0.498	0.257	2.983	3.169	3.207	1.678	2.026	3.044	3.362	3.494	0.574	1.308	2.714
147	0.919	0.141	0.123	0.878	1.287	0.105	0.466	0.166	0.112	0.194	0.342	0.305	0.643	0.217	0.155	0.156	0.163	0.442	0.258	0.317			147	3.289	0.459	0.565	2.288	1.833	0.654	0.943	1.529	0.631	1.632	0.733	0.189	0.118	0.216	0.356	2.962	2.754	1.137	0.327	0.119	0.48
148	1.324	0.427	0.128	3.099	3.372	0.141	0.466	1.015	0.372	0.211	3.183	2.391	0.413	0.278	0.412	0.416	0.859	3.379	2.483	0.434			148	3.252	3.213	2.352	3.186	2.78	2.712	1.665	3.141	1.309	2.617	3.044	3.162	3.345	2.203	3.369	3.305	2.451	3.387	1.485	2.968	3.154
149	1.078	0.462	0.138	3.389	3.541	0.227	0.717	1.519	0.472	0.272	3.266	3.059	1.545	0.654	1.618	0.196	0.463	3.413	2.612	1.318			149	3.26	3.243	2.331	3.12	3.205	2.778	1.826	2.585	2.09	2.169	3.232	3.277	3.26	0.167	3.406	3.247	3.364	3.478	3.158	2.617	3.263
150	0.795	0.236	0.102	2.529	2.279	0.085	0.385	0.178	0.097	0.192	0.582	0.363	0.158	0.242	0.086	0.148	0.149	2.634	0.194	0.207			150	1.343	0.192	0.107	0.253	1.21	0.3	1.609	0.189	0.606	0.179	0.273	0.276	0.338	0.086	0.406	0.528	1.14	0.594	0.197	0.093	0.108
151	0.745	0.108	0.227	2.561	0.218	0.08	0.445	0.145	0.087	0.152	0.198	0.277	0.11	0.123	0.11	0.138	0.199	0.166	0.306	0.241			151	1.097	0.08	0.072	0.07	0.059	0.235	0.312	0.141	0.695	0.499	0.081	0.605	0.088	0.059	0.081	0.075	0.118	0.221	0.146	0.092	0.077
152	1.031	0.121	0.111	0.112	0.273	0.091	0.778	0.164	0.107	0.187	0.106	0.363	0.148	0.145	0.101	0.221	0.15	0.204	0.309	0.246			152	1.739	0.084	0.147	0.096	0.072	0.089	0.512	0.232	0.811	0.074	0.102	0.093	0.08	0.095	0.083	0.088	0.13	0.247	0.189	0.087	0.086
153	1.007	0.107	0.1	0.209	0.21	0.093	0.654	0.143	0.223	0.172	0.105	0.35	0.123	0.147	0.096	0.191	0.138	0.208	0.405	0.163			153	1.199	0.094	0.106	0.109	0.074	0.083	0.449	0.209	0.788	0.076	0.095	0.086	0.097	0.089	0.092	0.093	0.119	0.26	0.163	0.092	0.084
154	1.333	0.107	0.115	0.125	0.213	0.094	1.068	0.163	0.111	0.186	0.101	0.411	0.157	0.154	0.107	0.167	0.154	0.275	0.337	0.211			154	1.122	0.081	0.107	0.106	0.067	0.097	0.56	1.188	0.799	0.073	0.094	0.079	0.077	0.109	0.079	0.081	0.113	0.25	0.174	0.098	0.086
155	1.056	0.105	0.111	1.996	0.221	0.093	0.787	0.155	0.11	0.158	0.095	0.483	0.127	0.15	0.094	0.188	0.137	0.168	0.451	0.196			155	1.26	0.086	0.129	2.653	0.069	0.427	0.721	0.216	0.796	0.315	0.095	0.09	0.16	0.126	0.102	0.087	0.114	0.269	0.192	2.198	0.088
156	1.059	0.241	0.261	1.356	0.251	0.088	0.831	0.172	0.168	0.166	0.138	2.032	0.162	0.177	0.13	0.227	0.182	0.269	0.375	0.239			156	1.058	0.154	0.147	2.62	0.082	0.245	0.65	0.256	0.742	0.628	0.169	0.166	0.143	0.152	0.117	0.124	0.162	0.3	0.233	2.245	0.088
157	1.166	0.136	0.12	0.178	0.224	0.116	1.005	0.171	0.207	0.213	0.104	0.482	0.144	0.241	0.105	0.178	0.176	0.183	0.283	0.228			157	1.175	0.089	0.186	1.073	1.209	0.145	0.669	0.209	0.805	0.091	0.378	0.132	0.086	0.109	0.088	0.094	0.16	0.247	0.195	0.088	0.171
158	1.006	0.228	0.125	0.254	0.214	0.105	0.685	0.173	0.29	0.215	0.105	0.375	0.127	0.218	0.108	0.176	0.167	0.197	0.291	0.22			158	1.25	0.107	0.12	0.555	0.093	0.107	0.328	0.216	0.682	0.094	0.303	0.12	0.101	0.089	0.129	0.096	0.127	0.295	0.152	0.094	0.092
159	0.925	0.114	0.11	0.104	0.18	0.089	0.651	0.16	0.102	0.201	0.099	0.307	0.133	0.22	0.095	0.161	0.163	0.14	0.239	0.222			159	2.026	0.101	0.938	0.138	0.076	0.082	0.555	0.172	0.732	0.078	0.088	0.093	0.077	0.08	0.083	0.085	0.108	0.264	0.17	0.119	0.085
160	1.163	0.187	0.121	0.142	0.208	0.104	0.761	0.169	0.113	0.216	0.099	0.356	0.145	0.21	0.102	0.173	0.18	0.152	0.255	0.26			160	1.265	0.091	1.687	0.077	0.086	0.086	0.536	0.243	0.77	0.112	0.108	0.094	0.084	0.093	0.084	0.111	0.144	0.261	0.179	0.09	0.114
161	1.011	0.108	0.117	0.098	0.209	0.106	0.576	0.165	0.113	0.195	0.094	0.348	0.144	0.208	0.105	0.175	0.147	0.202	0.226	0.269			161	1.292	0.08	0.124	0.07	0.069	0.083	0.639	0.194	0.775	0.079	0.095	0.092	0.078	0.075	0.079	0.091	0.109	0.252	0.199	0.084	0.111
162	0.997	0.116	0.102	0.131	0.209	0.119	0.571	0.147	0.1	0.207	0.104	0.275	0.189	0.203	0.189	0.161	0.195	0.153	0.197	0.379			162	1.336	0.06	1.015	0.194	0.051	0.215	0.547	0.172	0.789	0.056	0.072	2.111	0.06	0.065	0.069	0.065	0.104	0.21	0.171	0.07	0.084
163	1.222	0.099	0.096	0.184	0.281	0.099	0.805	0.173	0.103	0.161	1.092	0.401	0.155	0.138	0.159	0.172	0.144	0.301	0.901	0.347			163	1.457	0.065	0.12	2.733	2.17	2.44	0.904	0.237	0.858	2.067	0.09	2.532	0.063	0.188	0.066	3.139	0.103	2.169	0.173	2.506	0.086
164	1.186	0.152	0.116	0.11	0.212	0.096	0.998	0.16	0.121	0.18	0.981	0.412	0.147	0.15	0.107	0.182	0.153	0.199	0.414	0.293			164	1.385	0.084	0.167	0.075	1.366	1.405	0.57	0.232	0.84	1.701	0.103	2.085	0.079	0.121	0.094	2.658	0.146	1.466	0.206	1.12	0.126
165	0.889	0.119	0.112	2.043	0.197	0.105	0.677	0.163	0.111	0.186	0.111	0.35	0.146	0.193	0.095	0.131	0.143	0.18	0.275	0.247			165	1.173	0.091	0.107	0.075	0.071	0.084	0.516	0.186	0.79	0.626	0.095	0.085	0.078	0.101	0.097	0.085	0.119	0.197	0.175	0.09	0.087
166	0.738	0.108	0.106	2.911	1.829	0.094	0.42	0.143	0.3	0.176	2.341	0.284	1.087	0.231	0.089	0.143	0.125	0.156	0.183	0.194			166	1.228	0.079	0.094	0.071	0.075	0.085	0.434	0.143	0.651	0.785	0.088	0.082	0.078	0.081	0.09	0.581	0.11	0.213	0.169	3.588	0.121
167	0.713	0.117	0.13	0.275	0.212	0.117	0.37	0.636	0.14	0.176	0.409	0.39	0.334	0.15	0.148	0.14	0.13	0.128	0.233	0.173			167	0.81	0.079	0.092	0.071	0.084	0.159	0.323	0.114	0.62	1.697	0.092	0.106	0.084	0.093	0.09	0.095	1.478	0.227	0.163	1.62	0.603
168	0.783	0.29	0.955	0.112	0.324	0.103	0.523	0.188	0.15	0.182	0.137	0.425	0.2	0.176	0.142	0.173	0.186	0.227	0.226	0.262			168	0.839	0.137	0.133	0.124	0.091	0.125	0.512	0.163	0.665	0.536	0.193	0.184	0.152	0.164	0.124	0.169	0.186	0.25	0.214	0.102	0.237
169	0.737	0.181	0.131	0.191	0.225	0.098	0.544	0.146	0.113	0.244	0.113	0.359	0.167	0.48	0.159	0.173	0.185	0.233	0.237	0.287			169	0.827	0.123	0.197	0.108	2.413	0.202	0.714	0.168	0.757	0.184	0.134	0.166	0.109	0.095	0.115	0.104	0.134	0.277	0.212	0.096	0.196
170	1.055	0.164	0.144	0.307	0.227	0.164	0.52	0.155	0.123	0.3	0.113	0.406	0.366	0.234	0.306	0.191	0.188	0.225	0.209	0.246			170	0.742	0.113	0.111	0.096	0.085	0.104	0.59	0.246	0.467	0.139	0.128	0.115	0.092	0.088	0.093	0.44	0.134	0.266	0.164	0.133	0.099

## Sheet: 2B
Figure 2b
		005002	180003	056002	038001	216001	063003	200001	98001	070001	084001	005001	73001	87001	41001	90001	93001	180001	56003	98003	98004	63001	180002		F750712	F130210	F751102	F750407	F250108	F750706	F751101	F130102	F780102	F751104	F130105	F930210	F750401	F750702	F940216	F130207	F680112	F750202	F600101	F750804	F910104		10-1074	mGO53
YU2		42	63.3	45.45	67	69.5	48.55	63.75	78.65	47.6	43	8	4.255	17.95	39.2	36.8	25.45	33.75	16.25	20.9	6.29	8.56	7.96		49.35	18.85	24.5	13.75	14.4	18.35	25.05	14.65	32.8	22.35	74.75	25.95	6.88	25.95	14.77	12.9	4.97	23.65	14.9	8.655	36.6		52.85	1.22
AD8		70.5	74.35	67	42.6	76	39.95	66.5	71.75	41.95	23.15	1.955	3.03	10.135	23.75	17.3	11.95	13.65	5.66	3.66	3.73	1.925	3.825		16.35	23.9	8.5	13.65	19.8	8.395	30.75	72.7	89.95	11.4	39.25	52.25	9.975	9.145	20.65	14.5	41.3	28.7	6.395	66.9	8.185		76.4	1.19
CH058		33.15	33.25	43.05	13.5	42.6	30.55	27.05	58.3	13.3	12.7	1.055	2.885	3.24	9.24	6.345	5.375	4.385	4.49	3.56	2.595	2.84	6.79		15.55	6.575	7.9	5.405	10	9.485	22.1	10.215	69.15	12.25	46.65	60.95	4.335	6.185	3.985	13	3	23.6	8	4.67	28.25		69	1.065
REJO		2.575	26.25	10.155	22.7	1.03	0.375	1.19	8.28	1.1	0.51	2.765	0.395	12.15	0.55	1.155	4.805	1.35	0.55	0.24	2.99	0.74	0.32		0.215	0.145	0.265	0.215	0.18	0.1735	7.56	0.349	0.27	0.31	0.305	0.122	0.185	0.05	0.2	0.06	0.132	0.1115	0.1545	0.12	0.143		1.36	0.315
THRO		2.27	29.3	39.65	36.6	5.235	2.225	6.61	4.965	9.39	0.49	7.96	0.245	15.05	0.69	2.08	4.085	1.6	0.41	0.36	2.54	0.98	0.595		1.415	0.385	0.36	0.38	0.435	0.27	10.005	2.68	7.215	0.29	1.005	0.615	0.3	0.275	0.245	0.16	0.8	0.26	0.63	3.1	0.25		0.965	0.805
RHPA		8.43	56.7	33.8	51.4	3.02	1.07	2.79	5.06	0.82	3.465	7.545	0.68	3.66	2.435	0.35	0.915	0.5	0.43	0.445	0.525	0.375	0.425		0.265	0.33	3.45	0.15	0.48	0.29	2.705	0.78	2.56	0.595	0.125	1.045	0.285	1.87	0.315	0.111	0.17	0.415	0.215	0.165	0.426		40.7	0.61
WITO		2.755	24.25	9.655	41.45	0.97	0.375	1	10.025	0.53	0.555	4.71	0.235	0.545	1.3	0.755	0.505	0.405	0.275	0.2	0.48	0.46	0.185		0.775	0.52	0.66	0.575	0.43	0.6	3.43	0.68	0.875	1.05	1.745	0.355	1.07	0.36	0.49	0.45	0.645	0.3	0.525	0.665	0.56		12.39	0.795
NI		0.00512	0.013605	0.017	0.012	0.026	0.016	0.0205	0.0685	0.0155	0.037	0.013	0.026	0.00554	0.036	0.0225	0.022	0.016	0.006885	0.0165	0.023	0.017	0.0845		0.0205	0.0845		0.016		0.013605	0.0155	0.0225	0.026		0.036		0.0165			0.023	0.006885	0.022	0.017	0.0685			0.012	0.0052

## Sheet: 2C
Figure 2c
YU2 PTC												CH058 PTC
005002	2	0	1	3	0	19	22	23				005002	11	5	0	0	1	4	11	32
180003	1	16	10	24	20	14	22	28				180003	22	9	18	17	0	7	12	31
056002	0	18	5	5	0	8	12	25				056002	13	11	11	0	0	2	7	23
038001	0	14	0	18	0	6	14	23				038001	6	2	10	0	0	0	2	23
216001	25	20	13	25	0	18	22	19				216001	29	15	1	0	0	0	9	24
063003	8	0	1	14	0	10	14	15				063003	2	5	0	0	0	0	5	21
200001	3	11	0	16	0	6	14	20				200001	7	14	0	0	0	0	0	14
098001	2	6	0	4	0	12	15	13				098001	0	0	0	0	0	0	0	12
070001	0	1	0	7	0	12	9	13				070001	0	0	1	0	0	0	0	0
084001	0	0	0	0	0	0	1	11				084001	0	0	0	0	0	0	0	0
005001	0	6	0	6	0	1	9	21				005001	0	5	1	0	0	0	0	6
073001	0	0	0	0	0	0	0	0				073001	0	1	0	0	0	0	0	0
087001	0	0	0	0	0	0	8	7				087001	0	2	0	0	0	0	6	0
041001	0	1	0	3	0	1	9	17				041001	0	0	0	0	0	0	0	15
090001	0	2	0	0	0	0	1	4				090001	0	0	0	0	0	0	0	0
093001	0	1	0	11	0	1	10	22				093001	0	1	3	0	0	0	12	8
180001	0	0	0	0	0	10	9	8				180001	0	7	0	0	0	0	0	0
056003		0	0	0	0	0	0	0				056003	0	0	0	0	0	0	0	0
098003	0	0	0	3	0	0	7	4				098003	0	5	0	0	0	0	2	0
098004	0	0	0	6	2	0	5	0				098004	0	0	0	0	0	0	9	0
063001	0	0	0	0	0	2	1	0				063001	0	0	0	0	0	0	0	0
180002	0		0	0	0	11	10	0				180002	0	0	0	0	0	0	1	0
YU2 PTNC												CH058 PTNC
750712	16	2	4	9	3	17	16	25				750712	20	17	2	0	0	10	3	20
751102	1	13	5	8	0	10	16	30				751102	27	14	8	15	7	11	20	27
750407	4	6	2	7	8	6	13	22				750407	4	5	0	0	0	0	0	15
250108	0	14	3	8	0	9	8	21				250108	22	11	7	1	12	14	10	15
750706	31	23	17	32	0	27	28	27				750706	32	16	6	6	0	6	17	37
751101	0	14	6	24	0	15	16	25				751101	24	16	11	7	16	13	14	26
780102	19	21	10	25	6	14	16	25				780102	22	15	7	8	0	8	13	36
751104	0	22	8	26	0	15	19	31				751104	18	10	11	9	3	11	14	29
130105	8	14	6	8	0	11	15	18				130105	13	10	0	0	0	0	2	18
930210	25	13	9	23	0	14	21	32				930210	21	9	0	0	0	2	8	27
750401	0	9	1	15	0	1	15	24				750401	10	6	7	1	0	2	6	20
750702	9		7	18	4	19	27	27				750702	9	8	3	0	8	0	13	24
940216	17	3	5	15	5	16	13	24				940216	10	12	0	0	0	0	9	18
130207	0	6	0	8	6	4	17	15				130207	11	9	0	0	0	0	1	14
680112	0	3	0	13	0	7	9	14				680112	0	3	3	0	12	0	0	6
750202	0	8	0	14	0	2	11	20				750202	1	4	0	0	0	0	2	12
600101	0	4	0	2	0	0	6	17				600101	0	5	2	0	0	0	1	7
750804	0	1	0	0	0	0	10	18				750804	0	4	1	0	2	0	0	4
910104	18		9	26	8	21	29	30				910104	13	4	2	0	5	0	10	27

## Sheet: 2D
Figure 2d
YU2						CH058
	ePTC	sPTC	PTNC				ePTC	sPTC	PTNC
	9	2	11				8	1	9
	17	4	10				14	2	16
	9	1	8				8	0	3
	9	6	8				5	3	12
	18	4	23				10	1	15
	8	0	12				4	0	16
	9	2	17				4	1	14
	7	2	15				1	1	13
	5	0	10				0	0	5
	1	3	17				0	0	8
	5		8				2		6
	0		16				0		8
			12						6
			7						4
			6						3
			7						2
			4						2
			4						1
			20						8

[truncated: 45 more sheets: 2E, 2F, 3C, 3E, 3F, 4B, 4D, 4E, 4F, 5A, 5B, 5C, 5F, 5H, 5I, 5J, 5K, 5N, 6A, 6B …]
